# Supplementary material
Source: MDPI journal article supplement (https://www.mdpi.com/2072-4292/7/10/14227)
Supplement: s1 [file s1]

*Supplementary information*


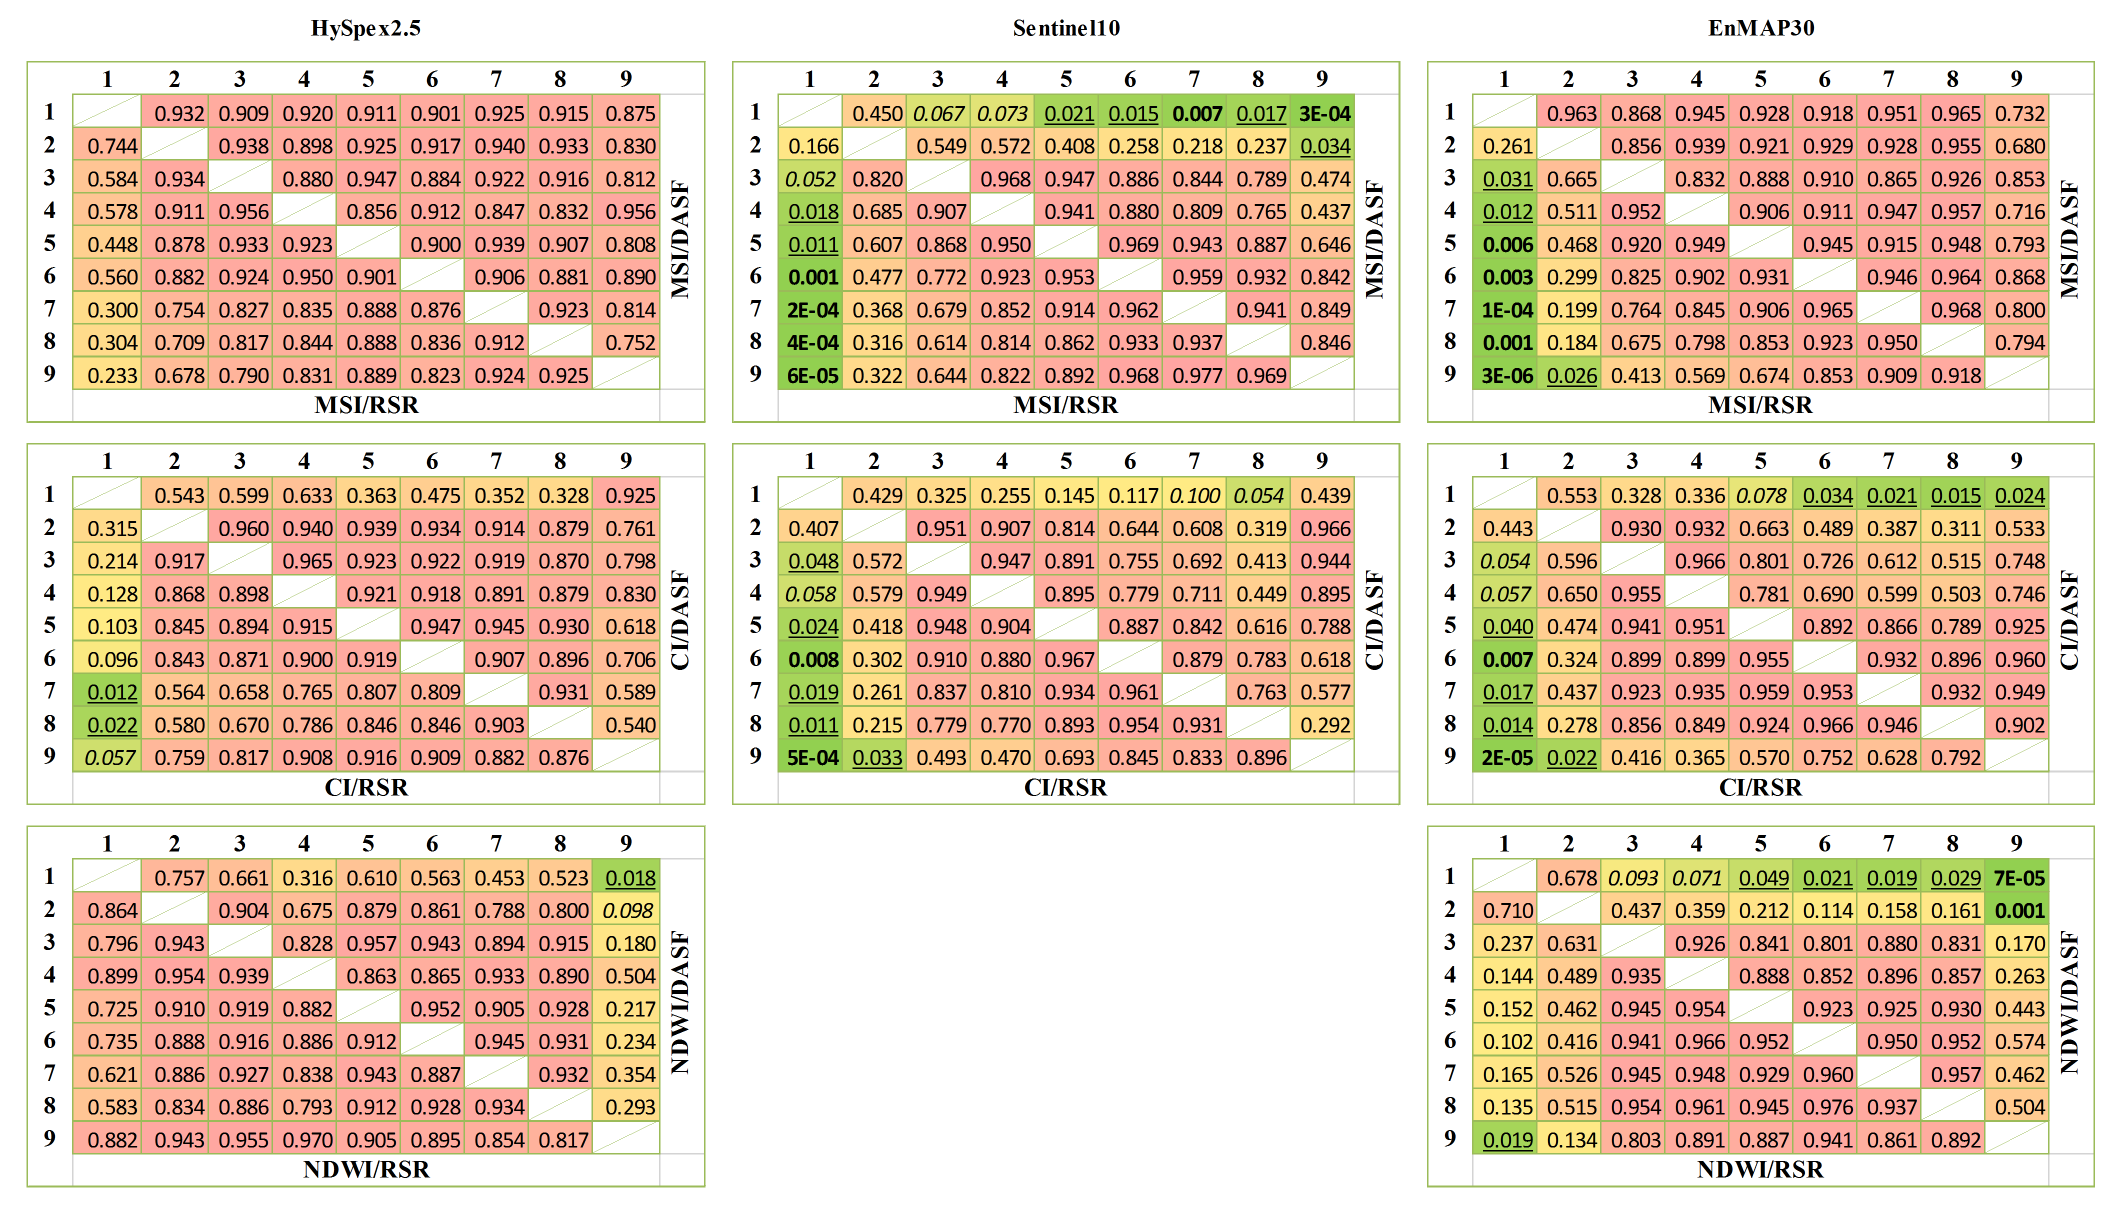


**Figure S1**. The p-value matrices from Tukey’s HSD test for each combination of SMCs show the normalization results of the water and chlorophyll indices (MSI, NDWI, CI) with the two other LAI proxies presented in the text (DASF, RSR). Colour scheme and character styles emphasize the significance levels (dark green/bold: 1%, green/underlined: 5%, yellow/italics: 10%). Left: results for HySpex data set, middle: results from simulated Sentinel-2 data set, right: results from simulated EnMAP data set.


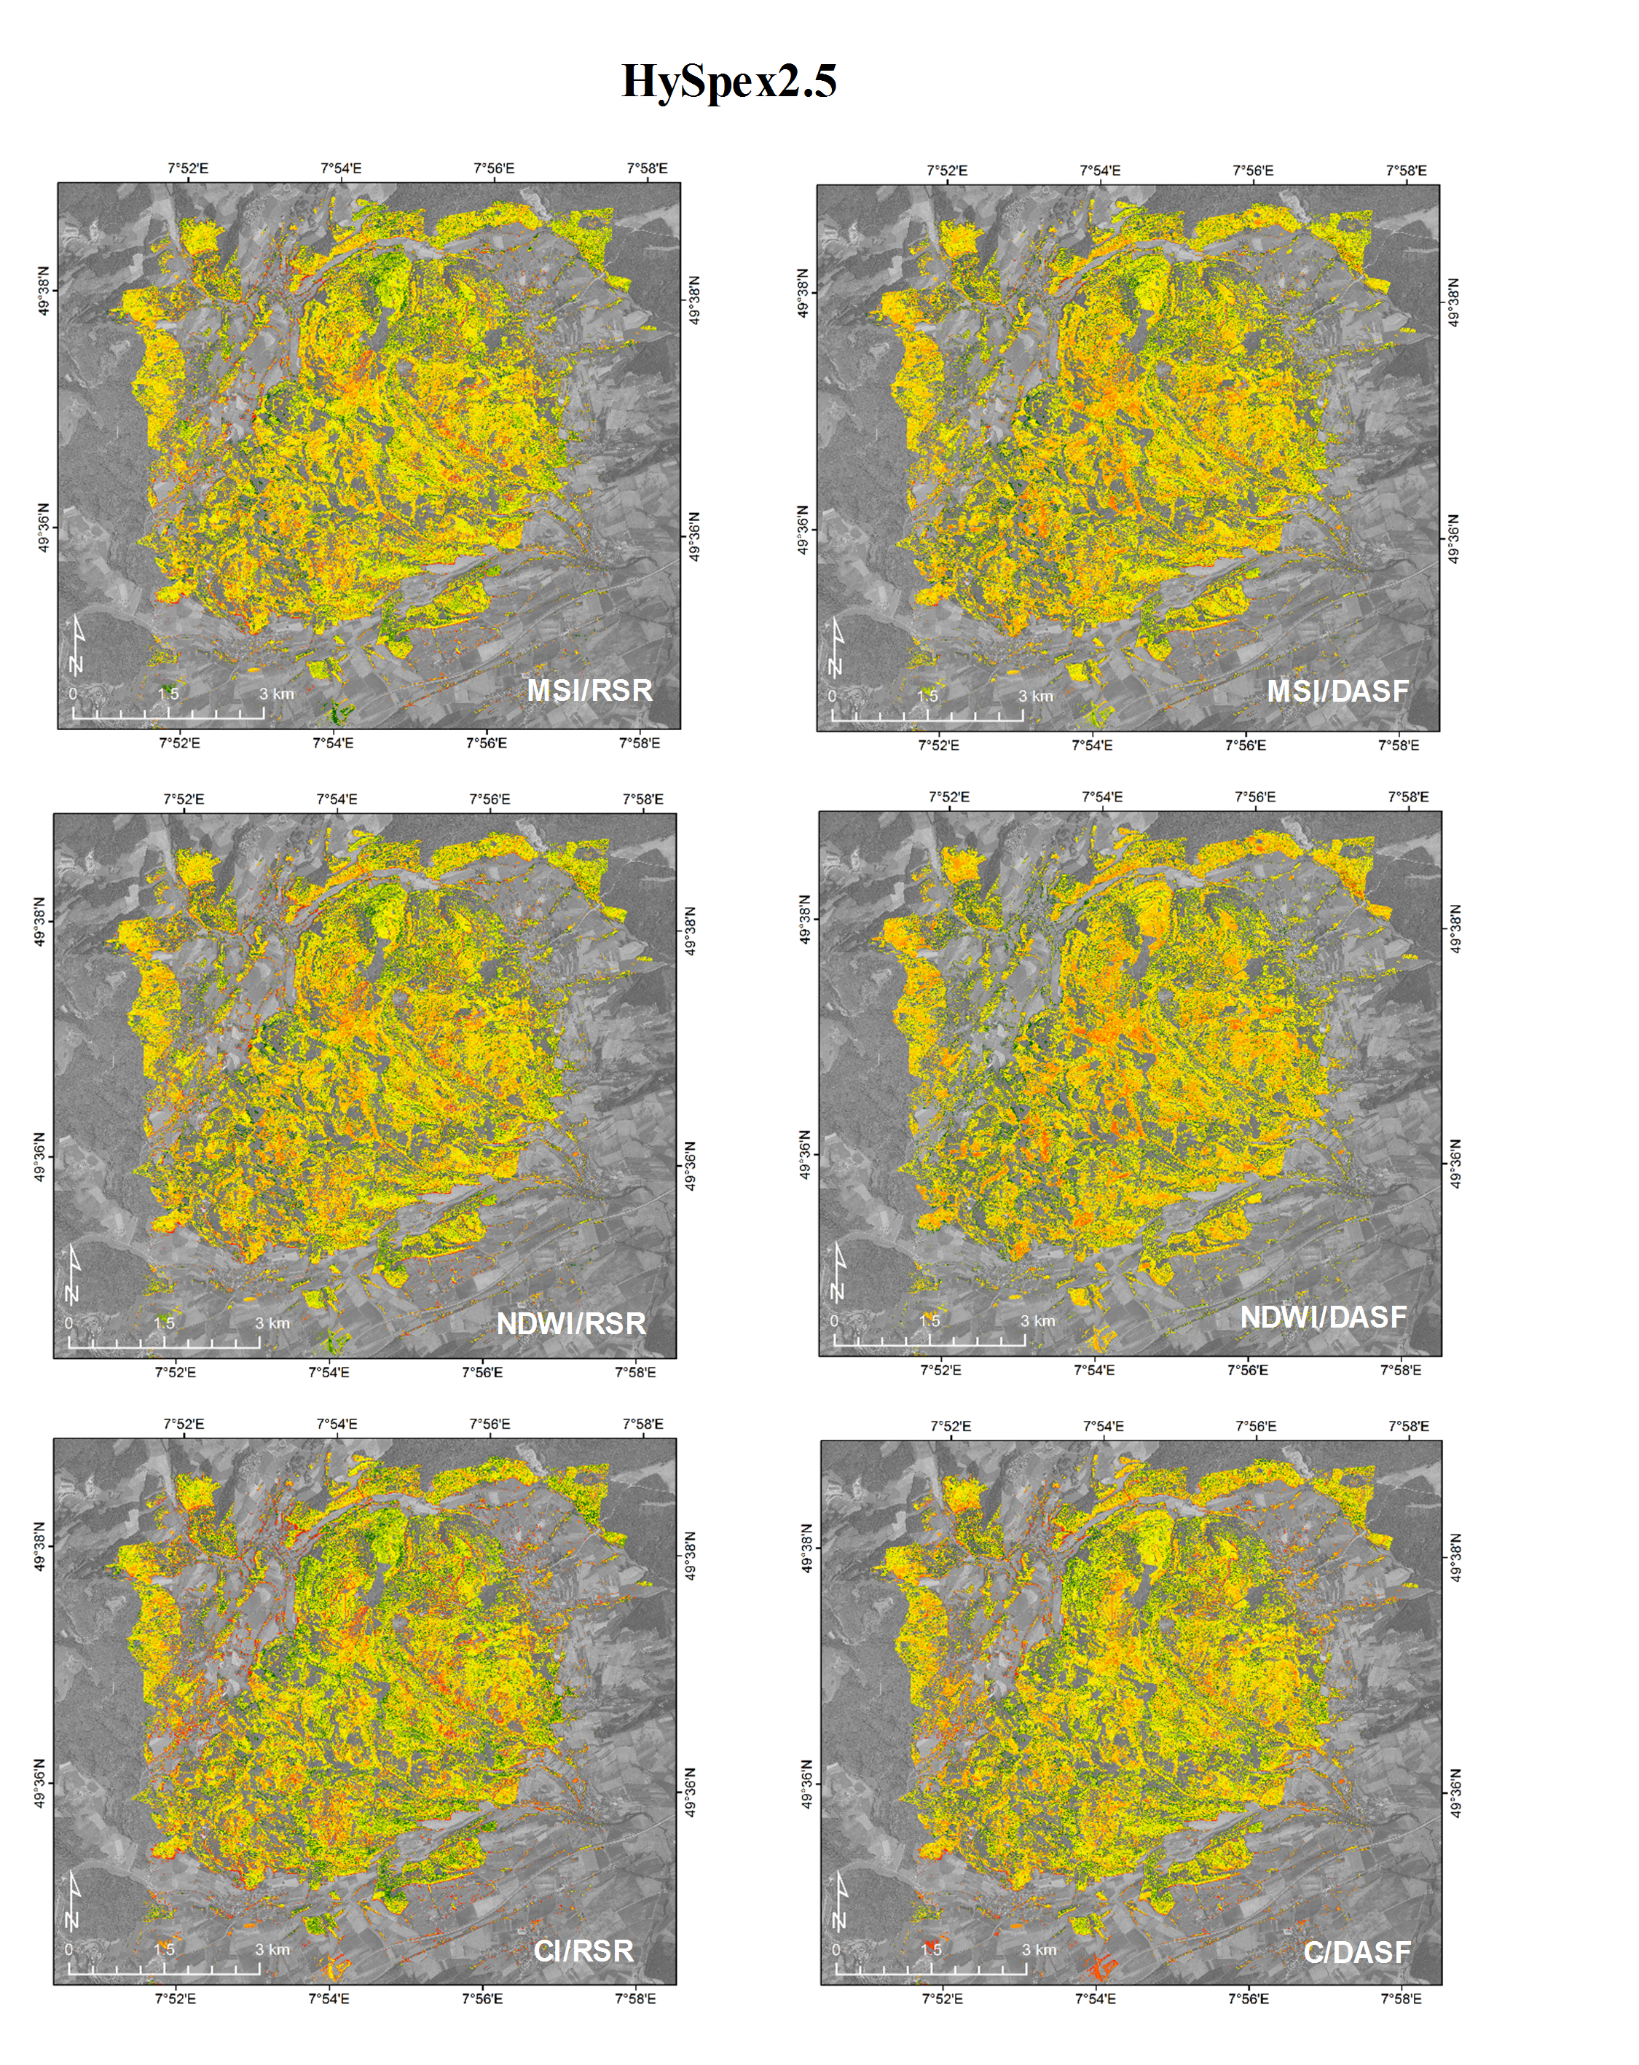


**Figure S2**. Maps of normalized indices (normalization with RSR on the left, normalization with DASF on the right) from the HySpex2.5 dataset.


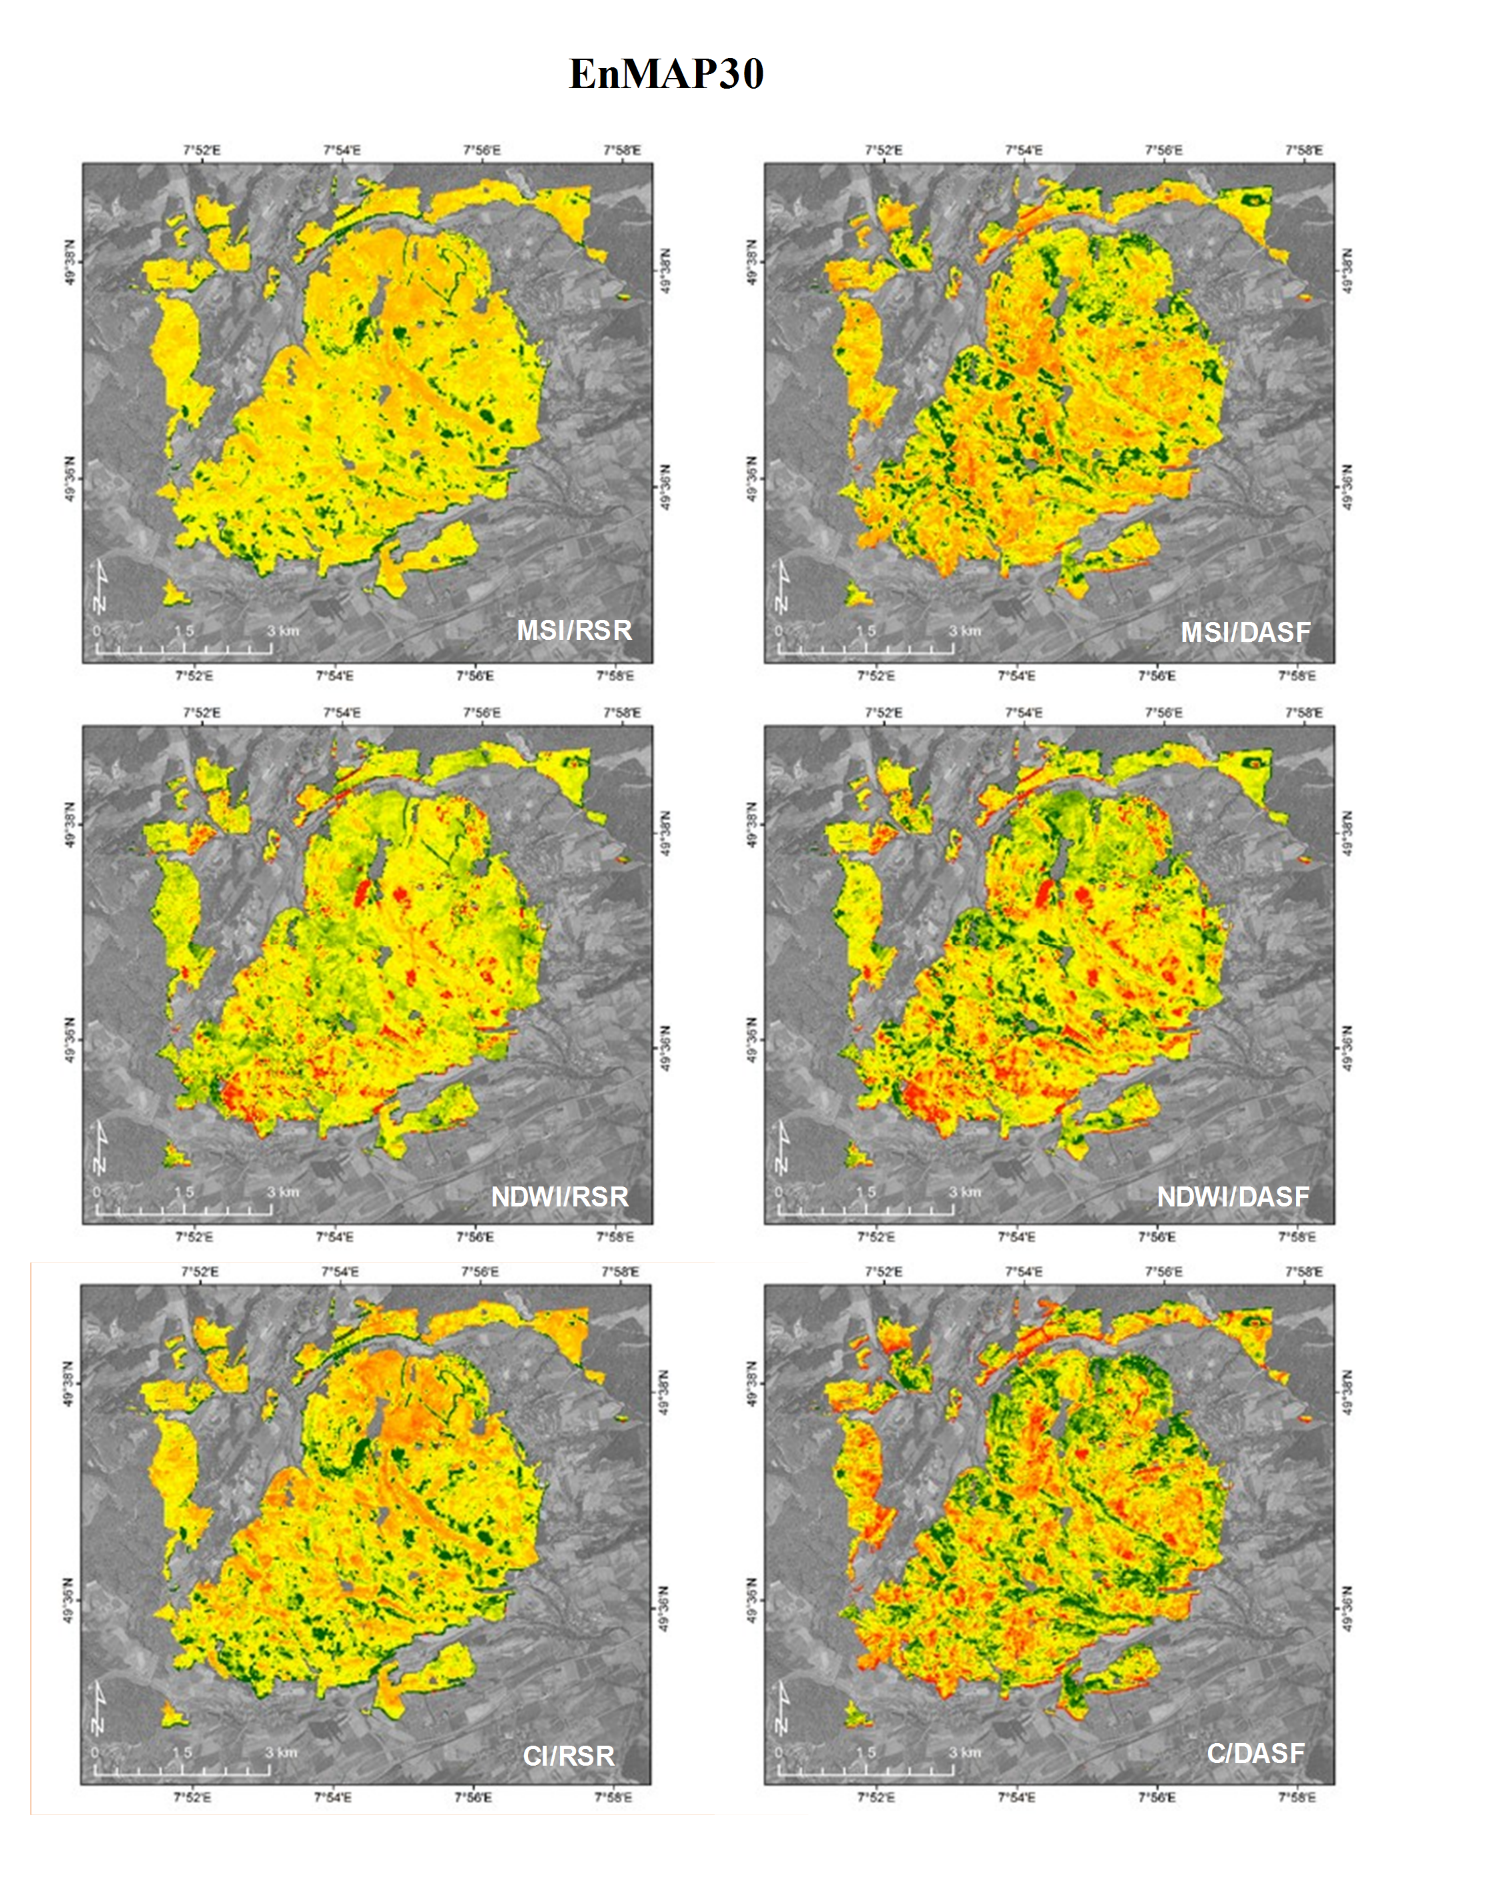


**Figure S3**. Maps of normalized indices (normalization with RSR on the left, normalization with DASF on the right) from the EnMAP30 dataset. Compare p values in Figure S1.


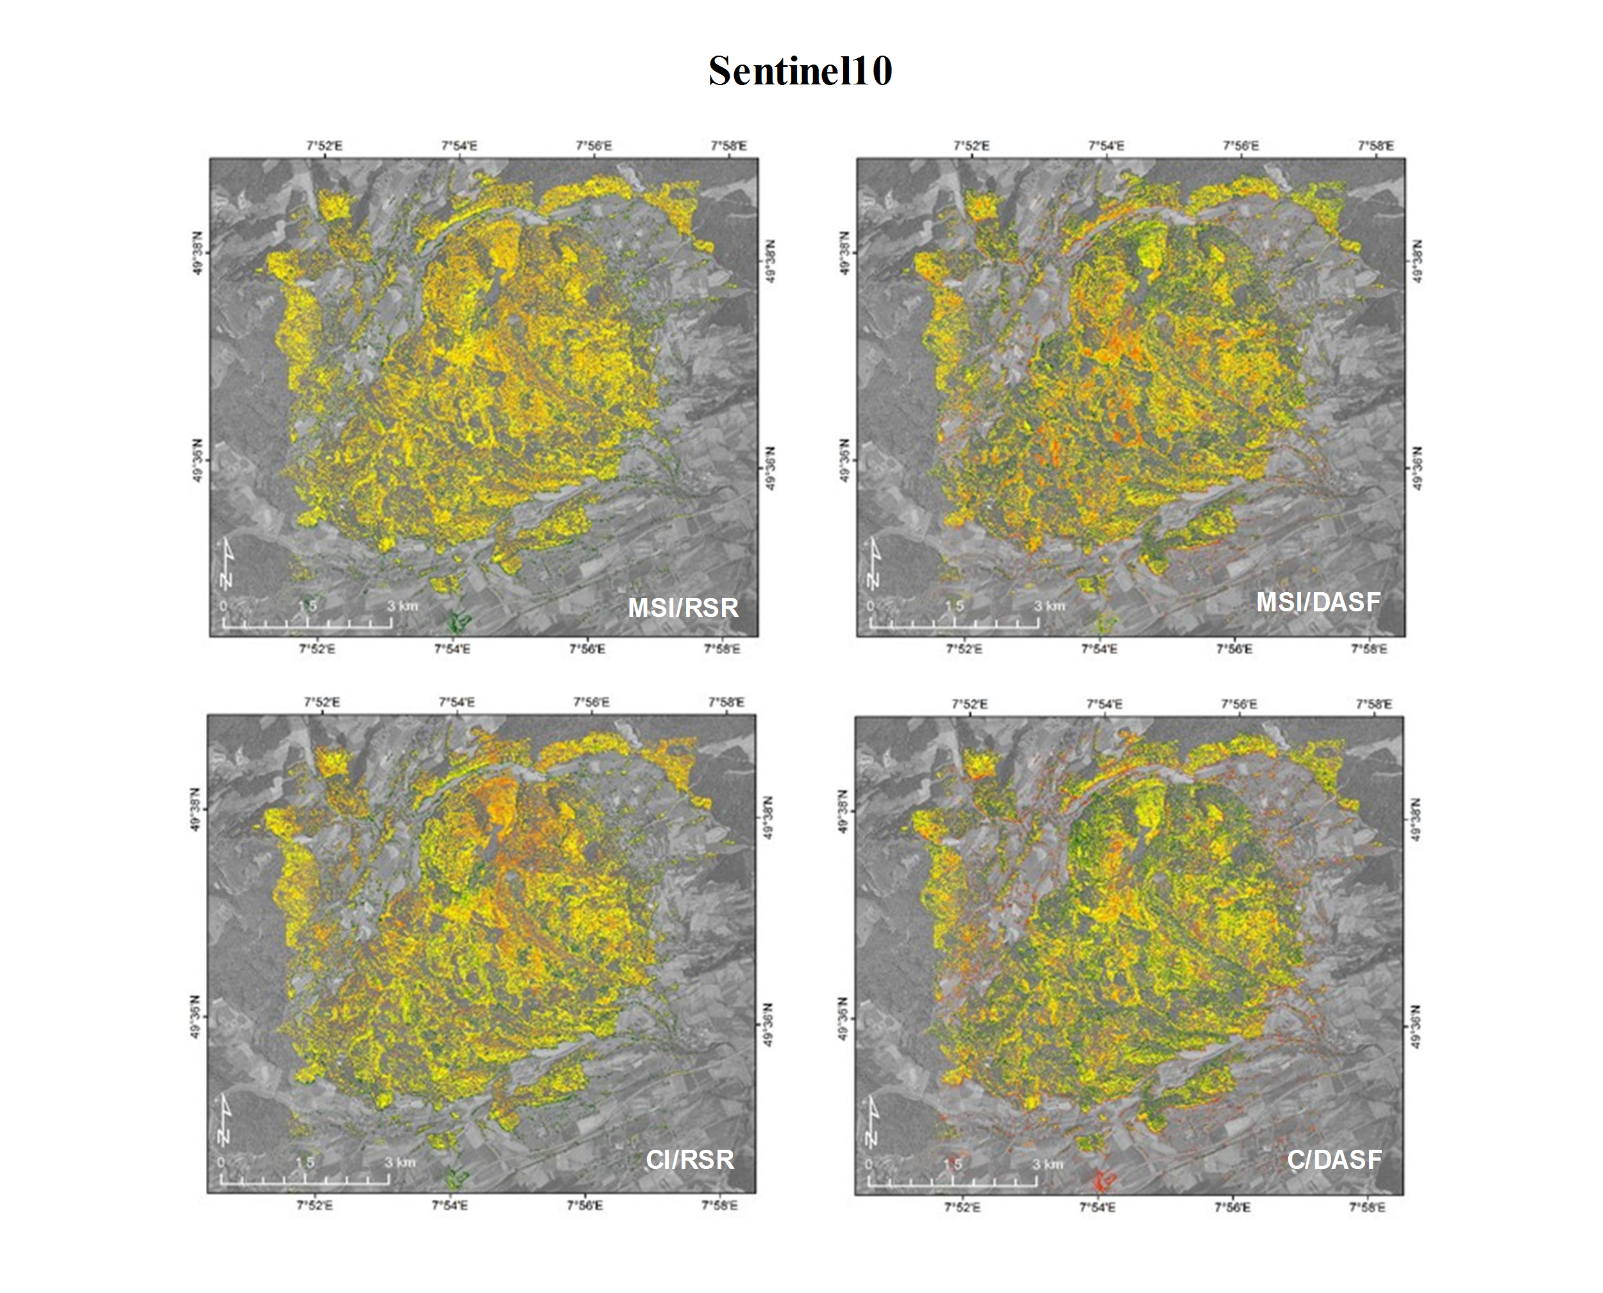


**Figure S4**. Maps of normalized indices (normalization with RSR on the left, normalization with DASF on the right) from the Sentinel10 dataset. Compare p values in Figure S1.


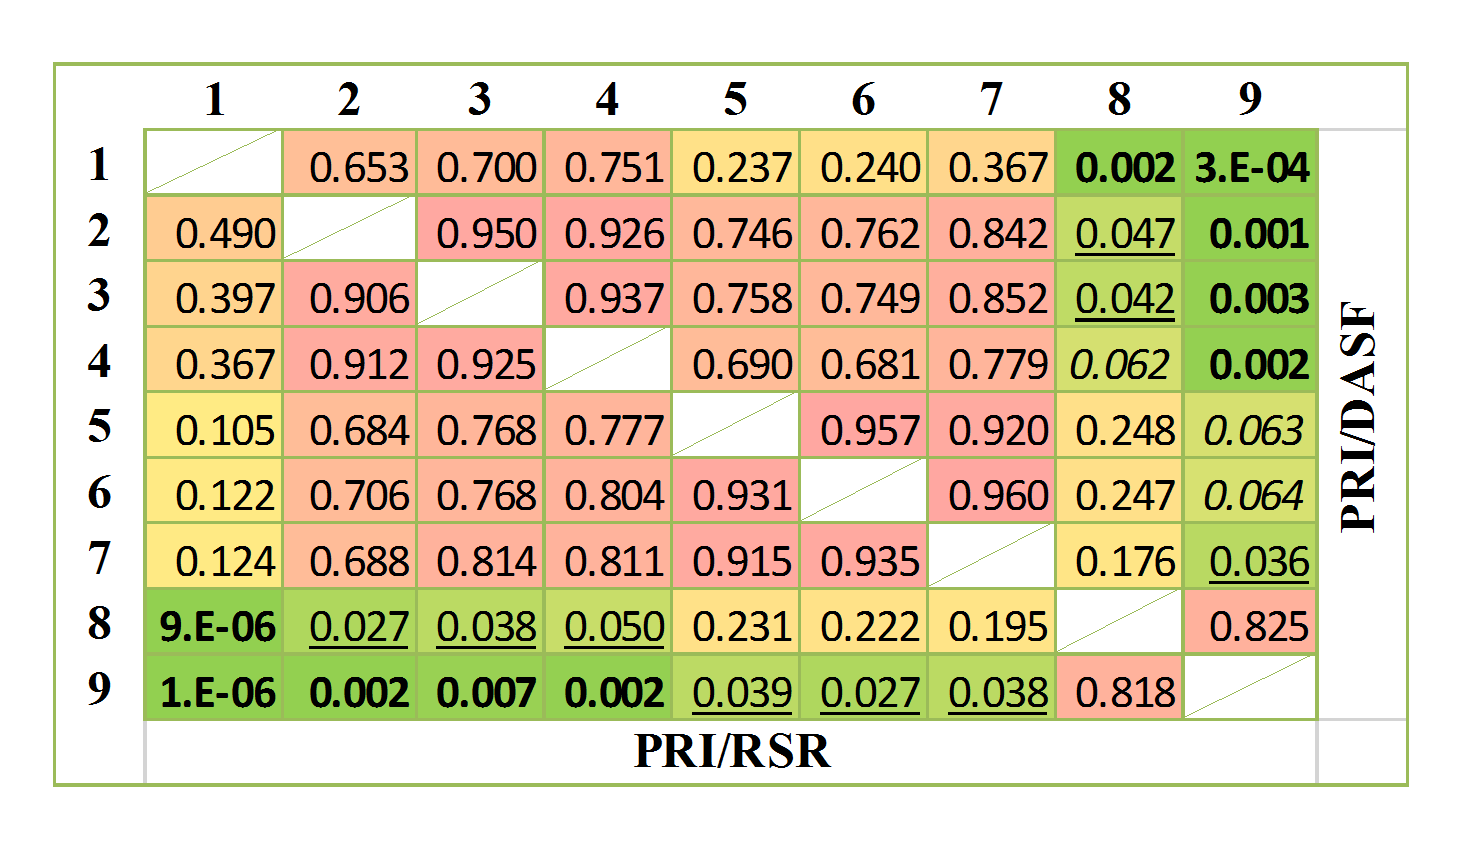


**Figure S5**. P-values for normalization of PRI with RSR (lower triangle), and DASF (upper triangle) calculated with HySpex2.5 dataset. Colour scheme and character styles emphasize the significance levels (dark green/bold: 1 %, green/underlined: 5%, yellow/italics: 10%).

© 2015 by the authors; licensee MDPI, Basel, Switzerland. This article is an open access article distributed under the terms and conditions of the Creative Commons Attribution license (http://creativecommons.org/licenses/by/4.0/).
